# Supplementary material
Source: HighWire-hosted journal article supplement (http://www.ajnr.org/highwire/filestream/71269/field_highwire_adjunct_files/0/19-00791.pdf)
Supplement: 19-00791.pdf [file 19-00791.pdf]

**Online Table: Demographic and clinical characteristics**

|                                                    | HC (n = 19)         | Total MS (n = 30)         | RRMS (n = 23)            | PMS (n = 7)                   | MS vs HC <sup>a</sup><br>(P Value) | RRMS vs PMS<br>(P Value) |
|----------------------------------------------------|---------------------|---------------------------|--------------------------|-------------------------------|------------------------------------|--------------------------|
| Age (mean) (range) (yr) <sup>15</sup>              | 39.9 ± 11.4 (23–61) | 43.9 ± 11.2 (23–60)       | 42.6 ± 10.6 (23–58)      | 48.1 ± 12.8 (26–60)           | .81 <sup>b</sup>                   | .32 <sup>b</sup>         |
| Female (No.) (%)                                   | 10 (53%)            | 24 (80%)                  | 19 (83%)                 | 5 (71%)                       | .04 <sup>c</sup>                   | .52 <sup>c</sup>         |
| Disease duration (mean) (range) (yr) <sup>15</sup> | NA                  | 10.8 ± 6.7 (1–23)         | 10.3 ± 6.7 (1–23)        | 12.3 ± 6.9 (4–23)             | NA                                 | .52 <sup>b</sup>         |
| Disease-modifying therapy (No.) (%)                | NA                  | 26 (87%)                  | 21 (91%)                 | 5 (71%)                       | NA                                 | .27 <sup>c</sup>         |
| Dimethyl fumarate                                  |                     | 8                         | 8                        | 0                             |                                    |                          |
| Glatiramer acetate                                 |                     | 6                         | 6                        | 0                             |                                    |                          |
| β-interferons                                      |                     | 4                         | 3                        | 2                             |                                    |                          |
| Fingolimod                                         |                     | 3                         | 2                        | 1                             |                                    |                          |
| Natalizumab                                        |                     | 2                         | 2                        | 0                             |                                    |                          |
| Rituximab                                          |                     | 2                         | 0                        | 2                             |                                    |                          |
| Ocrelizumab                                        |                     | 1                         | 1                        | 0                             |                                    |                          |
| None                                               |                     | 4                         | 2                        | 2                             |                                    |                          |
| EDSS score (mean) (range) <sup>41</sup>            | NA                  | 3.0 ± 1.9 (1–7.5)         | 2.1 ± 0.8 (1–3.5)        | 5.8 ± 1.6 (3–7.5)             | NA                                 | <.001 <sup>d</sup>       |
| MSFC-3 (mean) (range) <sup>41</sup>                | NA                  | −0.54 ± 2.06 (−6.21–1.08) | 0.30 ± 0.52 (−0.80–1.08) | −3.29 ± 2.82 (−6.21 to −0.05) | NA                                 | .002 <sup>d</sup>        |

**Note:**—NA indicates not applicable.

<sup>a</sup> Entire MS sample.

<sup>b</sup> Student *t* test.

<sup>c</sup>  $\chi^2$  test.

<sup>d</sup> Wilcoxon rank sum test.
